# Supplementary material for: Temporal Trend of Conventional Sperm Parameters in a Sicilian Population in the Decade 2011–2020
Source: PubMed Central journal article supplement (PMC7957883; doi:10.3390/jcm10050993), 2021-03-02
Supplement: jcm-10-00993-s001.pdf [file jcm-10-00993-s001.pdf]

**Supplementary Table S1.** Summary of the studies evaluating the decline of sperm conventional parameters over time.

| Author                        | Year | Study design        | Country               | WHO Manual           | Number                          | Concentration              | Total sperm count          | Progressive motility       | Total motility             | Morphology | Other                                     |
|-------------------------------|------|---------------------|-----------------------|----------------------|---------------------------------|----------------------------|----------------------------|----------------------------|----------------------------|------------|-------------------------------------------|
| Carlsen et al., [11]          | 1992 | Review              | -                     | NR                   | 14,947                          | ↓                          | ↓                          | NA                         | NA                         | NA         | NA                                        |
| Auger et al., [1]             | 1995 | Retrospective study | France                | WHO 1992             | 1351                            | ↓                          | NA                         | NA                         | ↓                          | ↓          | NA                                        |
| Adamopoulos et al., [2]       | 1996 | Retrospective study | Greece                | WHO 1992             | 2385                            | NA                         | ↓                          | NA                         | NA                         | NA         | NA                                        |
| Van Waeleghem et al., [3]     | 1996 | Retrospective study | Belgium               | WHO 1987             | 416                             | ↓                          | ↔                          | ↓                          | ↓                          | ↓          | NA                                        |
| Bujan et al., [16]            | 1996 | Retrospective study | France                | NR                   | 302                             | ↔                          | NA                         | NA                         | NA                         | NA         | NA                                        |
| Berling & Wölner-Hanssen [17] | 1997 | Retrospective study | Southern Sweden       | WHO 1992             | 718                             | ↑                          | NA                         | NA                         | ↑                          | ↑          | ↑<br>(base-value of the penetration test) |
| Rasmussen et al., [18]        | 1997 | Retrospective study | Denmark               | NR                   | 1055                            | ↔                          | NA                         | NA                         | NA                         | NA         | NA                                        |
| Emanuel et al., [19]          | 1998 | Retrospective study | Minnesota             | NR                   | 374                             | ↔                          | NA                         | NA                         | NA                         | NA         | NA                                        |
| Bilotta et al., [32]          | 1999 | Review              | Italy                 | NA                   | 1068                            | ↓                          | NA                         | NA                         | ↓                          | ↓          | NA                                        |
| Seo et al., [20]              | 2000 | Retrospective study | Korea                 | WHO 1987             | 22249                           | ↔                          | NA                         | NA                         | ↔                          | NA         | NA                                        |
| Gandini et al., [24]          | 2000 | Retrospective study | Italy                 | WHO 1982, 187, 1992  | 2471 (patients)<br>397 (donors) | ↓ (patients)<br>↔ (donors) | ↓ (patients)<br>↔ (donors) | ↓ (patients)<br>↓ (donors) | ↓ (patients)<br>↔ (donors) | NA         | NA                                        |
| Costello et al., [21]         | 2002 | Retrospective study | Australia             | WHO 1980, 1987, 1992 | 448                             | NA                         | ↔                          | NA                         | ↑                          | NA         | NA                                        |
| Marimuthu et al., [22]        | 2003 | Retrospective study | India                 | NR                   | 1176                            | NA                         | ↔                          | NA                         | NA                         | NA         | NA                                        |
| Vicari et al., [33]           | 2003 | Retrospective study | Italy                 | WHO 1999             | 716                             | ↓                          | NA                         | NA                         | NA                         | ↓          | NA                                        |
| Lackner et al., [5]           | 2005 | Retrospective study | Austria               | WHO 1987, 1992, 1999 | 7,780                           | ↓                          | NA                         | NA                         | NA                         | NA         | NA                                        |
| Spirada et al., [6]           | 2007 | Retrospective study | Northeast of Scotland | WHO 1993,1999        | 4832                            | ↓                          | NA                         | ↓                          | NA                         | NA         | NA                                        |
| Axelsson et al., [23]         | 2011 | Cohort study        | Sweden                | WHO 1999             | 511                             | ↔                          | ↔                          | NA                         | ↔                          | NA         | NA                                        |
| Elia et al., [34]             | 2012 |                     | Italy                 | WHO 1987, WHO 1999   | 1327                            | ↑                          | ↑                          | NA                         | NA                         | ↑          | NA                                        |
| Geoffroy-Siraudin et al., [8] | 2012 | Retrospective study | France                | WHO 1992, 2010       | 10 932                          | ↓                          | ↓                          | ↓                          | NA                         | ↓          | NA                                        |

|                       |      |                       |                                               |                      |        |    |    |    |    |    |                                |
|-----------------------|------|-----------------------|-----------------------------------------------|----------------------|--------|----|----|----|----|----|--------------------------------|
| Rolland et al.,       | 2013 | Retrospective study   | France                                        | NR                   | 26,609 | ↓  | NA | NA | ↑  | ↓  |                                |
| Mendiola et al., [10] | 2013 | Cross-sectional       | Southern Spain                                | WHO 1999             | 215    | NA | ↓  | NA | ↔  | ↔  | NA                             |
| Borges et al., [15]   | 2015 | Retrospective study   | Brazil                                        | NR                   | 2300   | ↓  | ↓  | ↔  | NA | ↓  | NA                             |
| Levine et al., [26]   | 2017 | Meta-regression study | North America, Europe, Australia, New Zealand | NR                   | 42 935 | ↓  | ↓  | NA | NA | NA | NA                             |
| Segupta et al. [27]   | 2017 | Meta-regression study | Africa                                        | NR                   | 6767   | ↓  | NA | NA | NA | NA | NA                             |
| Wang et al., [28]     | 2017 | Retrospective study   | China                                         | WHO 1999             | 5210   | ↓  | ↓  | ↓  | NA | NA | NA                             |
| Huang et al., [29]    | 2017 | Retrospective study   | China                                         | WHO 1999, 2010       | 30,636 | ↓  | ↓  | ↓  | NA | ↓  | NA                             |
| Basnet et al., [13]   | 2016 | Retrospective study   | North Norway                                  | WHO,1987, 1992,2010  | 5739   | ↓  | ↓  | NA | NA | NA | NA                             |
| Mishra et al., [14]   | 2018 | Review                | India                                         | NR                   | 13486  | ↓  | NA | ↔  | ↔  | ↓  | NA                             |
| Sugihara et al., [12] | 2020 | Retrospective study   | Belgium                                       | WHO 1992, 1997, 2010 | 807    | ↔  | ↓  | ↔  | ↔  | ↓  | ↔<br>(clinical pregnancy rate) |
| Vahidi et al., [25]   | 2020 | Retrospective study   | Iran                                          | WHO 1987, 1999       | 1815   | ↑  | NA | NA | NA | ↓  | NA                             |
| Present study         | 2021 | Retrospective study   | Italy                                         | WHO 2010             | 1409   | ↔  | ↓  | ↑  | NA | ↔  | NA                             |

**Abbreviations.** WHO, World Health Organization; NA, non assessed; NR, not reported.

↔, unchanged; ↓, reduced; ↑, increased.
